# Supplementary material for: How can we make self-sampling packs for sexually transmitted infections and bloodborne viruses more inclusive? A qualitative study with people with mild learning disabilities and low health literacy
Source: HighWire-hosted journal article supplement (doi:10.1136/sextrans-2020-054869), 2021-04-27
Supplement: sextrans-2020-054869supp002_data_supplement.pdf [file sextrans-2020-054869supp002_data_supplement.pdf]

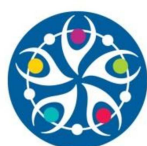**LUSTRUM**Limiting Undetected Sexually Transmitted  
Infections to RedUce Morbidity

Version 1, 1 September 2017

**Appendix 11: “Testing a sexual health treatment pack”****Study 5****Group discussion - Consent Form**

Researchers: Dr Maria Pothoulaki, Mr Alan Middleton, Professor Paul Flowers (Glasgow Caledonian University)

**Please tick the boxes below if you agree**

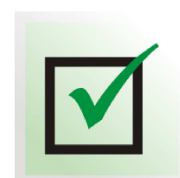

I have read and understood the information sheet about the study (dated 1 September 2017, version 1).

☐

I have had the opportunity to ask questions

☐

My age is between 18 and 65 years of age

☐

I understand that if I want I can leave the group discussion at any point

☐

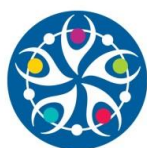**LUSTRUM**Limiting Undetected Sexually Transmitted  
Infections to RedUce Morbidity

Version 1, 1 September 2017

I agree to the group discussion being audio-recorded

☐I agree for researchers to use my direct words (quotations)  
in publications, reports and/or presentations, without  
revealing my name.☐I understand that my personal details will not be shared  
outside the research team☐I understand that the only reason for sharing my details is if  
I am in danger and need help to keep me safe☐I understand the information about the study and I can  
decide to take part☐

I agree to take part in the study

☐Please write  
your name

Date

Please sign  
above hereResearcher's  
name

Date

Researcher's  
signature
